# Supplementary material for: Acceptorless dehydrogenation of alcohols using Cu–Fe catalysts prepared from Cu–Fe layered double hydroxides as precursors
Source: Royal Society of Chemistry journal article supplement (doi:10.1039/c8cy00655e), 2018-01-01
Supplement: c8cy00655e1.pdf [file c8cy00655e1.pdf]

Chemical Communication – Supporting Information

**Acceptorless Dehydrogenation of Alcohols using Cu-Fe Catalysts Prepared from Cu-Fe Layered Double Hydroxides as a Precursor**

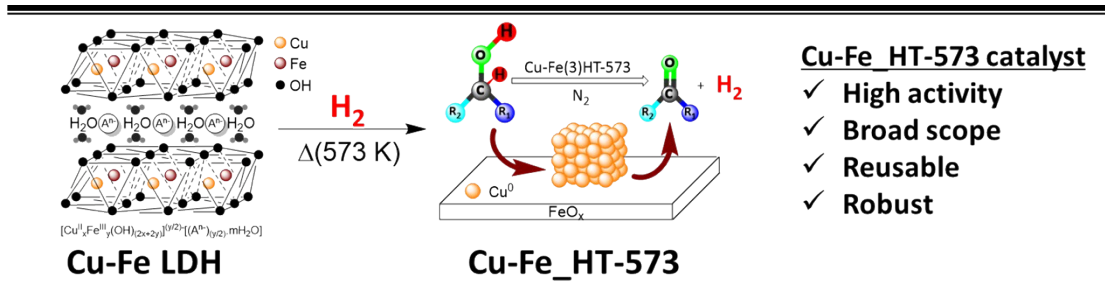

Wahyu Satpriyo Putro, Takashi Kojima, Takayoshi Hara, Nobuyuki Ichikuni, Shogo Shimazu\*  
Graduate School of Engineering, Chiba University, 1-33 Yayoi-cho, Inage-ku, Chiba 263-8522,  
Japan

## Experimental of Cu-Fe based catalysts synthesis method

### *Materials*

Copper (II) nitrate trihydrate (WAKO), Iron (III) nitrate nonahydrate (WAKO), NaOH (WAKO), p-xylene (WAKO), and trans-decahydronaphthalene (WAKO) were purchased and used as received. Organic chemical compounds, such as 1-phenylethanol (WAKO) and DMSO (TCI, >98%) were purified using procedures recorded at Purification of Laboratory Chemicals.

### *Synthesis of Cu-Fe(3)LDH*

The Cu-Fe(3)LDH sample was typically prepared in the following procedure: at room temperature,  $\text{Cu}(\text{NO}_3)_2 \cdot 3\text{H}_2\text{O}$  (4 mmol) and  $\text{Fe}(\text{NO}_3)_3 \cdot 9\text{H}_2\text{O}$  (2 mmol) was dissolved in 85 mL deionized water. The mixture solution was stirred 30 minutes at room temperature. About 15 M NaOH 2.0 M was dropwisely added to mixture solution. The solution was refluxed at 333 K for 24 h under air atmosphere.

### *Synthesis of Cu-Fe catalysts*

Cu-Fe catalysts were produced by reduction process of the LDHs precursors. The reduction process followed three pathways to obtain Cu-Fe catalysts using various reductants, i.e. molecular  $\text{H}_2$  or ethylene glycol. At the first pathway, the Cu-Fe LDHs were calcined at 923 K for 5 h under an air atmosphere (Cu-Fe\_C-973), prior to the reduction process using 30 mL ethylene glycol in an autoclave reactor at 423 K for 24 h to give reduced-calcined Cu-Fe catalysts (denoted as R\_Cu-Fe\_C). At the second procedure, the reduction of calcined Cu-Fe catalysts with molecular  $\text{H}_2$  at 573 K for 1 h produced Cu-Fe catalysts, denoted as Cu-Fe\_C\_HT. Another process is the reduction of Cu-Fe LDHs (without calcination treatment) with molecular  $\text{H}_2$  at 573 K for 1 h to give Cu-Fe\_HT-573 catalysts.

### *Synthesis of supported Cu/Fe<sub>3</sub>O<sub>4</sub> catalysts*

The supported Cu/Fe<sub>3</sub>O<sub>4</sub> catalysts were synthesized by various methods, such as impregnation ( $\text{Cu}/\text{Fe}_3\text{O}_4^{\text{imp}}$ ), co-precipitation ( $\text{Cu}/\text{Fe}_3\text{O}_4^{\text{co-p}}$ ), and physical mixture ( $\text{Cu}/\text{Fe}_3\text{O}_4^{\text{pm}}$ ) methods. The Cu(20%)/Fe<sub>3</sub>O<sub>4</sub><sup>imp</sup> catalysts were prepared by the following procedure: at room temperature,  $\text{Cu}(\text{NO}_3)_2 \cdot 3\text{H}_2\text{O}$  (0.7609 g) was diluted to the 100 mL of deionized water. The Fe<sub>3</sub>O<sub>4</sub> (0.8 g) was added to the Cu solution. The mixture was then stirred at 373 K to vaporized the water. The black powder was dried under vacuum condition overnight at room temperature. The dried powder was reduced with an  $\text{H}_2$  treatment at 573 K prior to the catalytic test. The Cu/Fe<sub>3</sub>O<sub>4</sub>(3)<sup>imp</sup> catalysts were prepared with the same procedure with Cu(20%)/Fe<sub>3</sub>O<sub>4</sub><sup>imp</sup>, but using  $\text{Cu}(\text{NO}_3)_2 \cdot 3\text{H}_2\text{O}$  (3.624 g) and Fe<sub>3</sub>O<sub>4</sub> (0.3859 g) as the starting materials. Cu(20%)/Fe<sub>3</sub>O<sub>4</sub><sup>co-p</sup> catalysts were prepared by the following pathway:  $\text{Cu}(\text{NO}_3)_2 \cdot 3\text{H}_2\text{O}$  (0.7609 g) was diluted to the 85 mL of deionized water before the addition of Fe<sub>3</sub>O<sub>4</sub> (0.8 g). The mixture was stirred and mixed with NaOH 2M 15 mL as a precipitator at room temperature. The suspension was

subsequently placed in a sealed Teflon lined autoclave for the hydrothermal process at 423 K for 24 h. The black fluffy solid was filtered, washed using deionized water and acetone several times, and dried under vacuum overnight. The black powder was treated with H<sub>2</sub> at 573 K prior to the catalytic reaction. The Cu/Fe<sub>3</sub>O<sub>4</sub>(3)<sup>co-p</sup> catalysts were prepared with the identical procedure with Cu(20%)/Fe<sub>3</sub>O<sub>4</sub><sup>co-p</sup>, but using Cu(NO<sub>3</sub>)<sub>2</sub>·3H<sub>2</sub>O (3.624 g) and Fe<sub>3</sub>O<sub>4</sub> (0.3859 g) as the starting materials. Finally, the Cu(20%)/Fe<sub>3</sub>O<sub>4</sub><sup>pm</sup> catalysts were prepared by following pathway: Cu metal (0.2 g) was simply added Fe<sub>3</sub>O<sub>4</sub> (0.8 g) and ground into the mortar before taking H<sub>2</sub> treatment for activation. The Cu/Fe<sub>3</sub>O<sub>4</sub>(3)<sup>pm</sup> catalysts were prepared with the similar manner to Cu(20%)/Fe<sub>3</sub>O<sub>4</sub><sup>pm</sup>, but using 0.66 g of Cu metal and Fe<sub>3</sub>O<sub>4</sub> (0.8 g) as the starting materials.

#### *Catalytic test*

The mixture of catalyst (100 mg), 1-phenylethanol (1 mmol), *trans*-decahydronaphthalene (0.08 g), and solvent (p-xylene, 3 mL), was poured into the Schlenk tube, followed by filling with N<sub>2</sub>. Then, the resulting mixture was stirred under reflux, and the reaction temperature was varied in the range of 100-130 °C. Conversion and yields of products were determined by GC using *trans*-decahydronaphthalene as an internal standard. The other unknown products were identified by GC-MS.

### **Analytical technique**

#### *Gas Chromatography (GC)*

Substrate conversion was determined by GC (Shimadzu GC-14B) equipped with a flame ionization detector, and RT-βDexSm (30 m, DF=1.4 μm, 0.25 mm) for monitoring the dehydrogenation of 1-phenylethanol with *trans*-decahydronaphthalene as an internal standard. The GC was operated under the conditions as follow: injection temperature (230 °C), detection temperature (230 °C), initial temperature (120 °C), initial time (1 min) progress rate (10 °C/min), final temperature (180 °C), and final time (1 min). The other substrates of secondary alcohols are detected by using Rtx-BAC PLUS 1 or InertCap 624 column, depending on the peak separation. The sample was introduced into the column *via* split mode (1/50) and the system used nitrogen gas as a carrier gas with the rate of 50 kPa at carrier P1 and 100 kPa at carrier P2.

#### *X-Ray Diffraction*

XRD measurements were recorded on a D8 ADVANCE, Bruker using monochromatic Cu Kα radiation (λ = 0.15418 nm). The XRD was operated at 40 kV and 40 mA with divergence and scattering slit 1°, a step width of 0.02° and scan speed of 2° min<sup>-1</sup>.

## Result

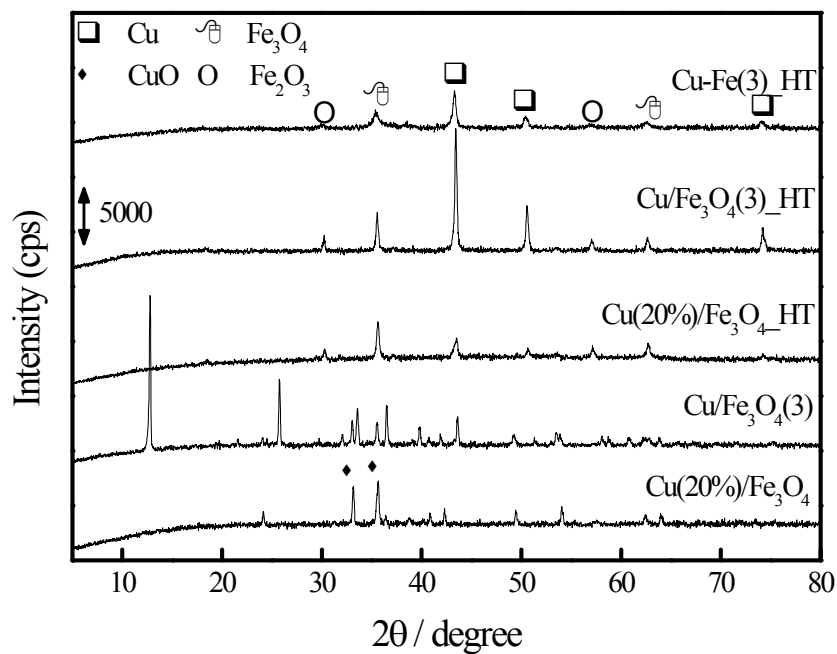

**Fig. S1** XRD patterns of Cu-Fe(3)\_HT-573 and various treatments of Cu/Fe<sub>3</sub>O<sub>4</sub> catalysts prepared by co-precipitation method.

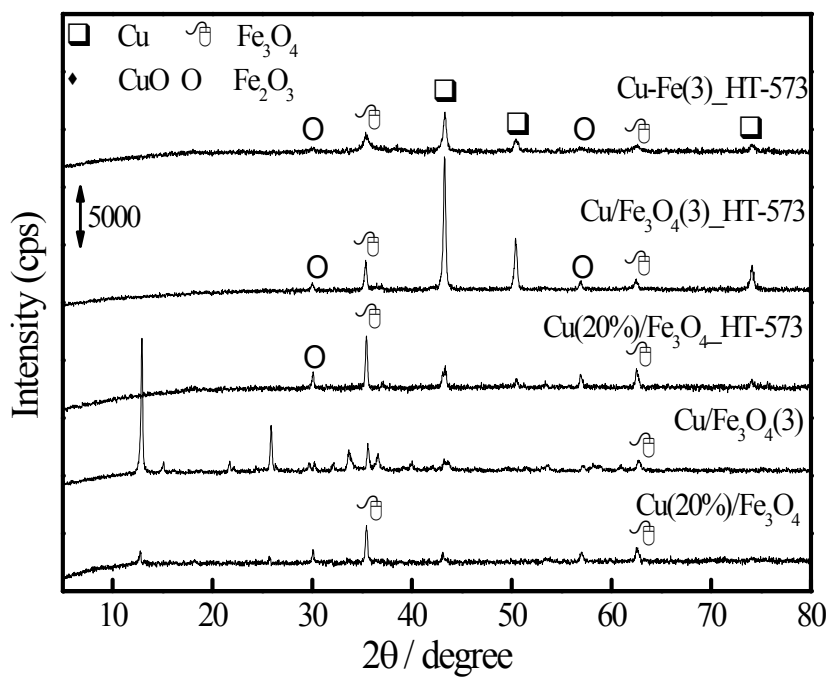

**Fig. S2** XRD patterns of Cu-Fe(3)\_HT-573 and various treatments of Cu/Fe<sub>3</sub>O<sub>4</sub> catalysts prepared by impregnation method.

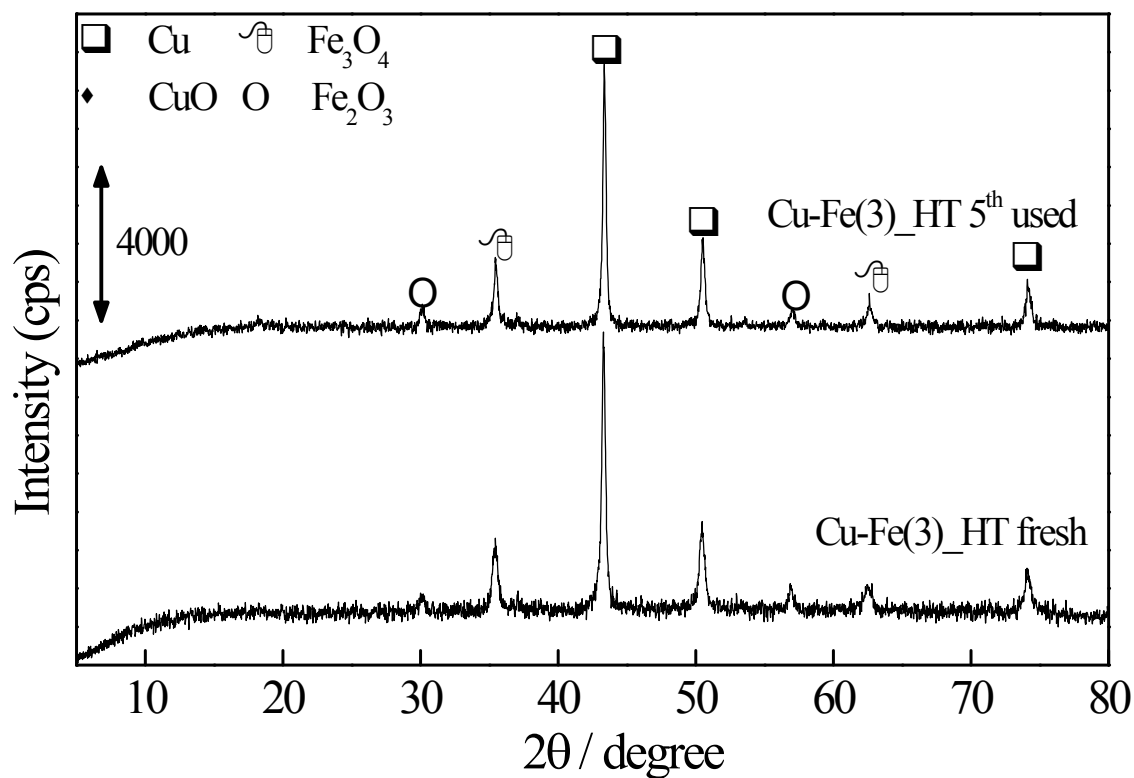

**Fig. S3** XRD patterns of fresh and used Cu-Fe(3)\_HT-573 catalysts

**Table S1.** The crystallite size of Cu metal on Cu-Fe catalysts after taking various treatments

| Entry | Catalyst               | D(nm) | $a$ (Å) |
|-------|------------------------|-------|---------|
| 1     | Cu-Fe(3)_HT-573        | 33.2  | 3.62    |
| 2     | Cu-Fe(3)_C-HT-573      | 48.1  | 3.62    |
| 3     | Cu-Fe(3)_C_R           | 56.3  | 3.62    |
| 4     | Cu-Fe(3)_HT-573 (used) | 32.1  | 3.62    |

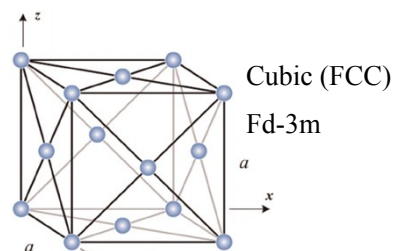

The crystallite size,  $D$ , was calculated using Debye-Scherrer equation from the XRD of Cu (111) peak at  $2\theta \sim 43^\circ$ . The lattice constant,  $a$ , was calculated from the peak of Cu(111) based on the index of cubic (FCC) with a space group of Fd-3m.

**Table S2. The quantification data of H<sub>2</sub> and acetophenone formation with time progress.**

1-phenylethanol  $\xrightarrow[\text{N}_2, 388 \text{ K}]{\text{Cu-Fe HT}}$  Acetophenone + H<sub>2</sub>

| Time<br>(h) | Conv.<br>(%) | Product<br>(%) | Product<br>(mmol) | Product<br>sel. <sup>a</sup> (%) | H <sub>2</sub> production |      |                             | H <sub>2</sub> sel. <sup>c</sup><br>(%) |
|-------------|--------------|----------------|-------------------|----------------------------------|---------------------------|------|-----------------------------|-----------------------------------------|
|             |              |                |                   |                                  | V1                        | V2   | H <sub>2</sub> <sup>b</sup> |                                         |
| 0           | 0            | 0              | 0                 | —                                | 50.8                      | 0    | 0                           | —                                       |
| 1           | 37.3         | 37.3           | 0.41              | 100                              | 42                        | 8.8  | 0.39                        | 95.1                                    |
| 2           | 50.3         | 50.3           | 0.56              | 100                              | 39.3                      | 11.5 | 0.51                        | 91.1                                    |
| 4           | 69.5         | 69.1           | 0.77              | 99.4                             | 34.6                      | 16.2 | 0.72                        | 93.5                                    |
| 8           | 90.1         | 89.3           | 0.99              | 99.1                             | 30.4                      | 20.4 | 0.91                        | 91.9                                    |
| 12          | 93.5         | 92             | 1.02              | 98.4                             | 29.5                      | 21.3 | 0.95                        | 93.1                                    |
| 16          | 97.1         | 95.5           | 1.06              | 98.4                             | 29.3                      | 21.5 | 0.96                        | 90.6                                    |
| 20          | 100          | 97             | 1.08              | 97                               | 29.1                      | 21.7 | 0.97                        | 89.8                                    |

<sup>a</sup>Selectivity of product (acetophenone). V1 = volume monitored in volumetric flask (mL). V2 = volume of H<sub>2</sub> gas formed (initial volume monitored – volume monitored at a certain time) (mL).

<sup>b</sup>Mole of H<sub>2</sub> (mmol) is converted in turns of V<sub>STP</sub> (22.4 L.mol<sup>-1</sup>). <sup>c</sup>H<sub>2</sub> selectivity (H<sub>2</sub> Sel. = mole of H<sub>2</sub> / mole of product \* 100%)

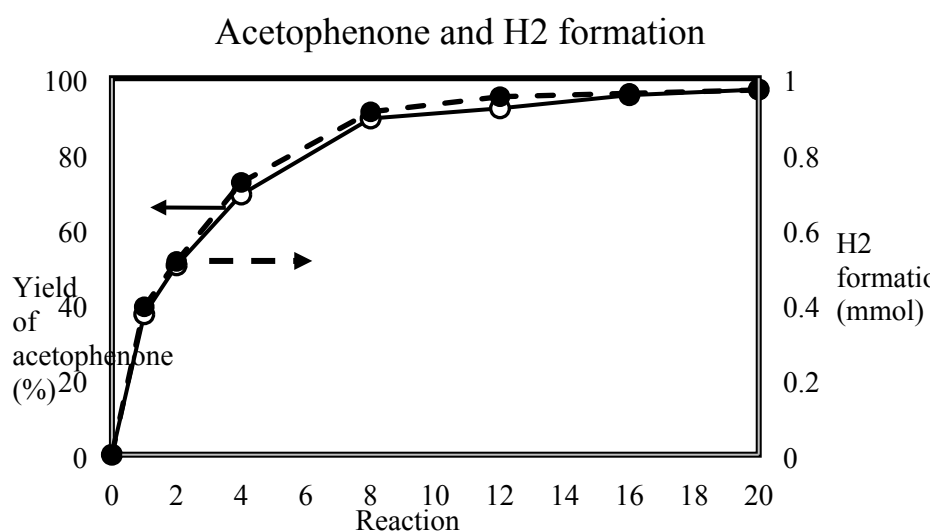

**Fig. S4** The evolution of H<sub>2</sub> and acetophenone formation with the time progress.

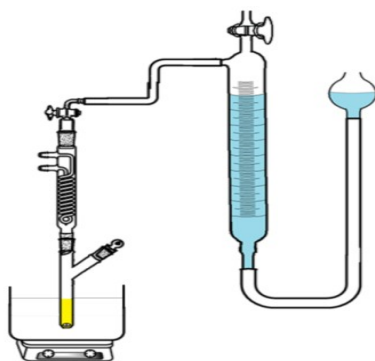

**Fig. S5** Reaction setup for the measurement of evolved hydrogen gas.

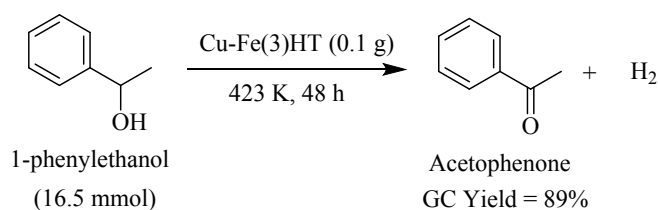

**Scheme. S1** The large-scale dehydrogenation of 1-phenylethanol (16.5 mmol).

**Table S3.** AD reaction of benzyl alcohol using Cu-Fe(3)HT with the various condition.

| $  \begin{array}{ccc}  \text{C}_6\text{H}_5\text{CH}_2\text{OH} & \xrightarrow[\text{Cu-Fe(3)HT}]{\text{N}_2} & \text{C}_6\text{H}_5\text{CHO} \\  \text{Benzyl alcohol} & & \text{Benzaldehyde}  \end{array}  $ |      |                                |          |                |           |
|------------------------------------------------------------------------------------------------------------------------------------------------------------------------------------------------------------------|------|--------------------------------|----------|----------------|-----------|
| Entry                                                                                                                                                                                                            | T(K) | Additive                       | Solvent  | Conversion (%) | Yield (%) |
| 1                                                                                                                                                                                                                | 388  | —                              | p-xylene | 34             | 31        |
| 2                                                                                                                                                                                                                | 398  | —                              | p-xylene | 63             | 38        |
| 3                                                                                                                                                                                                                | 408  | —                              | p-xylene | 81             | 46        |
| 4                                                                                                                                                                                                                | 388  | La <sub>2</sub> O <sub>3</sub> | p-xylene | 27             | 16        |
| 5                                                                                                                                                                                                                | 388  | Y <sub>2</sub> O <sub>3</sub>  | p-xylene | 27             | 25        |
| 6                                                                                                                                                                                                                | 388  | MgO                            | p-xylene | 70             | 21        |
| 7                                                                                                                                                                                                                | 388  | KOH                            | p-xylene | 80             | 4         |
| 8                                                                                                                                                                                                                | 388  | KHCO <sub>3</sub>              | p-xylene | 46             | 10        |
| 9                                                                                                                                                                                                                | 388  | t-BuOK                         | p-xylene | 98             | 6         |
| 10                                                                                                                                                                                                               | 388  | —                              | DMF      | 13             | 13        |
| 11                                                                                                                                                                                                               | 388  | —                              | o-xylene | 51             | 34        |
| 12                                                                                                                                                                                                               | 388  | —                              | DMSO     | 15             | 15        |

*Reaction conditions:* W<sub>CAT</sub> = 100 mg; W<sub>ADD</sub> = 25 mg; C<sup>o</sup><sub>SUBS</sub> = 0.37 M; V<sub>SOLV</sub> = 3 mL; t = 20 h; N<sub>2</sub> atmosphere.

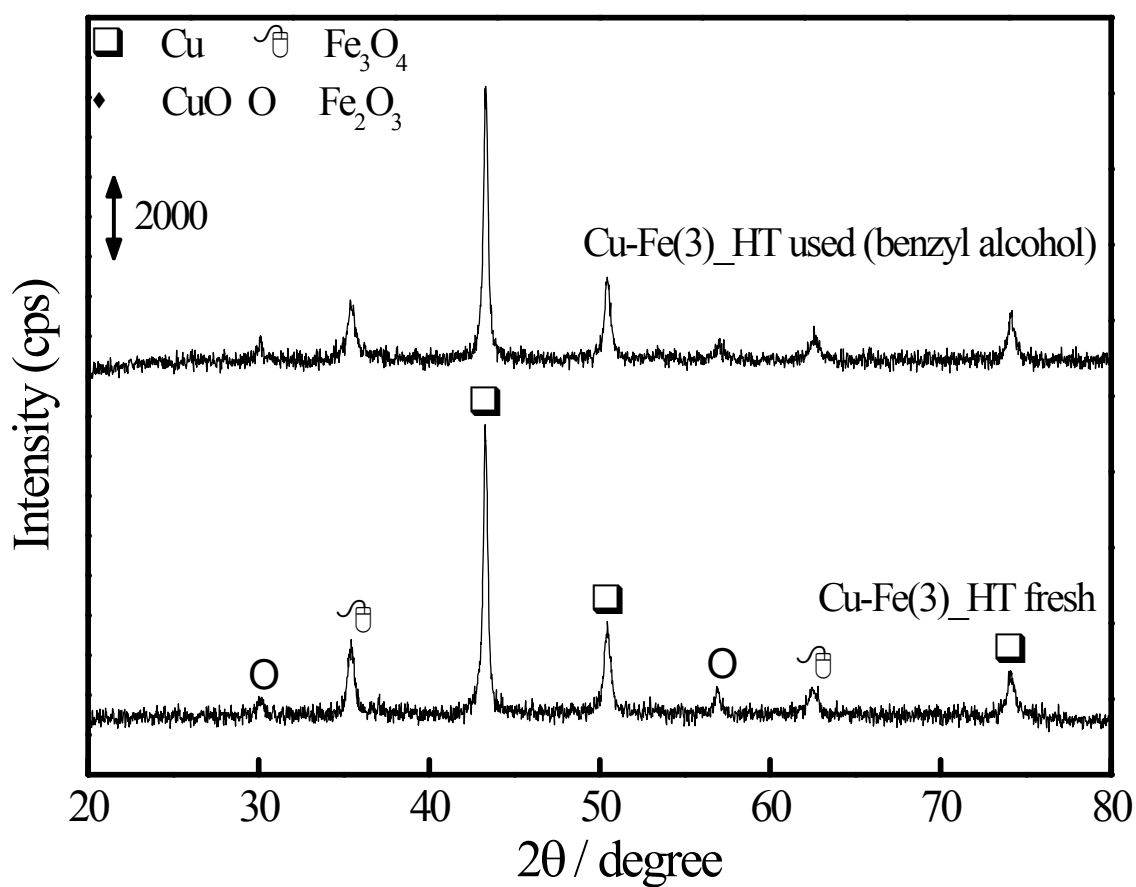

**Fig. S6** XRD patterns of fresh Cu-Fe(3)\_HT-573 catalyst and Cu-Fe(3)\_HT-573 catalyst after used for dehydrogenation of benzyl alcohol.

**Table S4.** The effect of various substrate on the AD reaction using Cu-Fe(3)\_HT catalysts

| Entry | Substrate I                                                                                            | Substrate II                                                                                          | Conversion (%)                        | Yield (%)                             |
|-------|--------------------------------------------------------------------------------------------------------|-------------------------------------------------------------------------------------------------------|---------------------------------------|---------------------------------------|
| 1     | 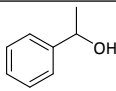<br>1-Phenylethanol | —                                                                                                     | 100                                   | 97                                    |
| 2     | <br>Benzyl alcohol  | —                                                                                                     | 32                                    | 32                                    |
| 3     | <br>1-Phenylethanol | <br>Benzyl alcohol | Substrate I = 42<br>Substrate II = 26 | Substrate I = 38<br>Substrate II = 22 |



*Reaction conditions:*  $W_{\text{CAT}} = 100 \text{ mg}$ ;  $C^{\circ}_{\text{SUBS}} = 0.37 \text{ M}$ ;  $V_{\text{P-XYLENE}} = 3 \text{ mL}$ ;  $T = 388 \text{ K}$ ; under  $\text{N}_2$  atmosphere.
